# Supplementary material for: Characterization and Application of an Alginate Lyase, Aly1281 from Marine Bacterium Pseudoalteromonas carrageenovora ASY5
Source: MDPI journal article supplement (doi:10.3390/md18020095), 2020-01-31
Supplement: s1 [file s1]

# Characterization and application of an alginate lyase, Aly1281 from Marine bacterium *Pseudoalteromonas carrageenovora* ASY5

Yong-Hui Zhang<sup>a,b,c,#</sup>, Yuan Shao<sup>a,b,c,#</sup>, Chao Jiao<sup>a,b,c</sup>, Qiu-Ming Yang<sup>a,b,c</sup>, Hui-Fen Weng<sup>a,b,c</sup> and An-Feng  
Xiao<sup>a,b,c,\*</sup>

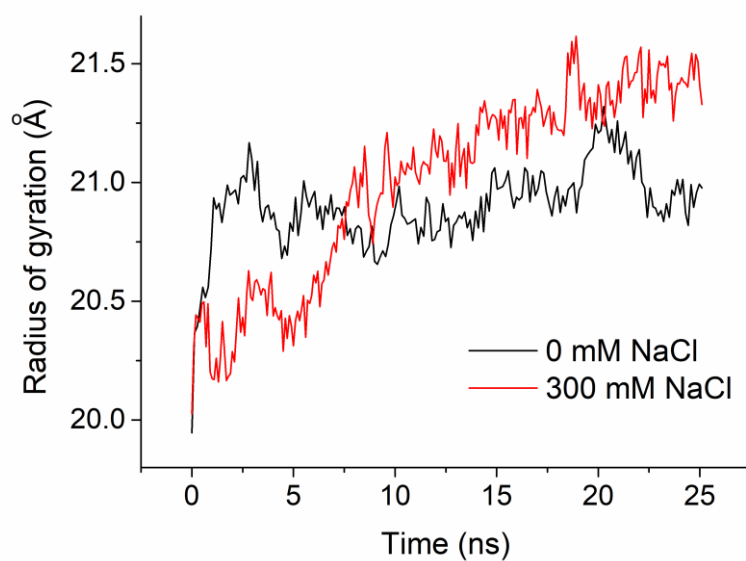

**Figure S1.** The radius of gyration of Aly1281 during 25 ns MD simulation as a function of time.
